# Supplementary material for: Development and Validation of a Multivariable Lung Cancer Risk Prediction Model That Includes Low-Dose Computed Tomography Screening Results: A Secondary Analysis of Data From the National Lung Screening Trial
Source: PubMed Central journal article supplement (PMC6484623; doi:10.1001/jamanetworkopen.2019.0204), 2019-03-01
Supplement: jamanetwopen-2-e190204-s001.pdf [file jamanetwopen-2-e190204-s001.pdf]

## Supplementary Online Content

Tammemägi MC, ten Haaf K, Toumazis I, et al. Development and validation of a multivariable lung cancer risk prediction model that includes low-dose computed tomography screening results: a secondary analysis of data from the National Lung Screening Trial. *JAMA Netw Open*. 2019;2(3):e190204. doi:10.1001/jamanetworkopen.2019.0204

**eFigure 1.** Flow Chart Describing NLST Analytic Sample for the Current Study

**eFigure 2.** PLCO2012results Model Calibration – Observed vs Predicted 3-Year Lung Cancer Risks From 1 to 4 Years After Last Screen in the LSS

(Development) and ACRIN (Validation) LDCT Screening Arms (Line Graphs)

**eFigure 3.** Receiver Operator Characteristic Area Under the Curves for Predicting Lung Cancer in the LSS and ACRIN NLST LDCT Arms 1 to 4 Years Post-Screening for the PLCOm2012bu Model and PLCO2012results Model, Which Additionally Includes Lung-RADS Results Coded in Four Groups

**eTable 1.** Characteristics of the NLST LDCT Participants Who Were Included in Prediction Modelling Analysis

**eTable 2.** Comparison of the Distributions of Dichotomized Lung-RADS Results Over Three Rounds of NLST LDCT Screening in Four Groups and Lung Cancers Occurring 1 to 4 Years Following the Third and Final Screen

**eTable 3.** Sensitivity, Specificity, Positive Predictive Value for the PLCOm2012bu and PLCO2012results Models With 3-Year Risk Thresholds of 0.75%, 1.0% and 1.5% in LSS and ACRIN Components of the NLST

**eAppendix.** Decision Curve Analysis (DCA) Comparing the Net Benefit of PLCOm2012bu Plus Screening Results (PLCO2012results) vs PLCOm2012bu

**eFigure 4.** Decision Curve Analysis Comparing PLCO2012results Which Includes Three Years of Lung-RADS Results Coded Into Four Groups vs the Equivalent Model Excluding Screening Results (PLCOm2012bu†), in NLST LDCT Data (N = 22,229)

**eReference.**

This supplementary material has been provided by the authors to give readers additional information about their work.

**eFigure 1.** Flow chart describing NLST analytic sample for the current study

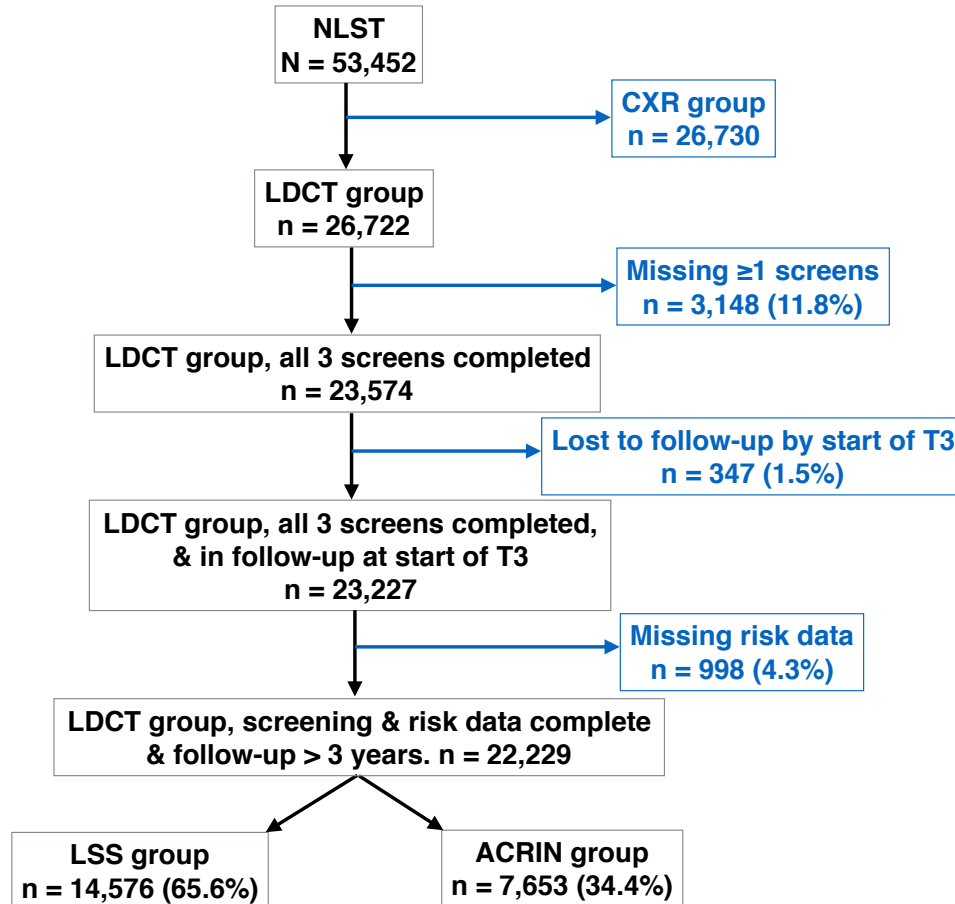

**Abbreviations:** ACRIN, American College of Radiology Imaging Network; CXR, chest x-ray; LDCT, low dose computed tomography; LSS, Lung Screening Study component of the NLST; N, number in overall sample; n, number in subsample; NLST, National Lung Screening Trial, T3, is the third years after study entry, or one year after the last (T2) screen.

**eFigure 2.** PLCO2012results\* model calibration – observed vs predicted 3-year lung cancer risks from 1 to 4 years after last screen in the LSS (development) and ACRIN (validation) LDCT screening arms (line graphs). Distributions of lung cancer cases and non-cases risks are shown in the scatter plot.

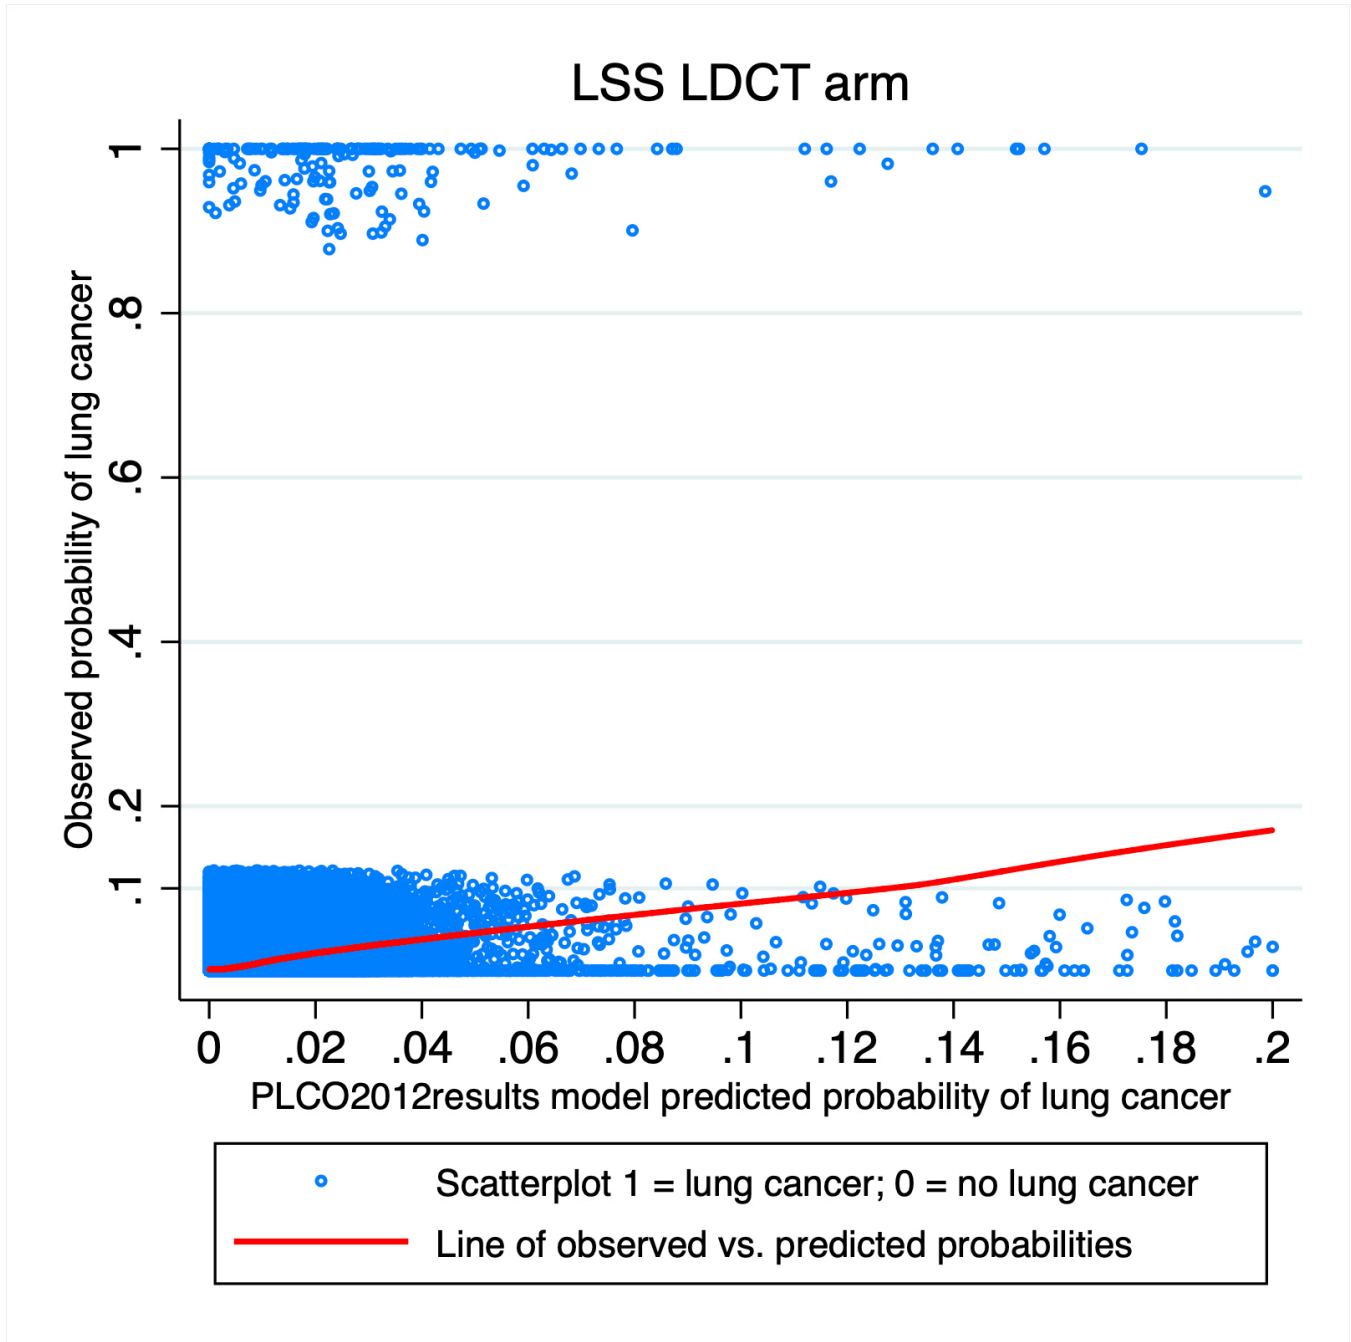

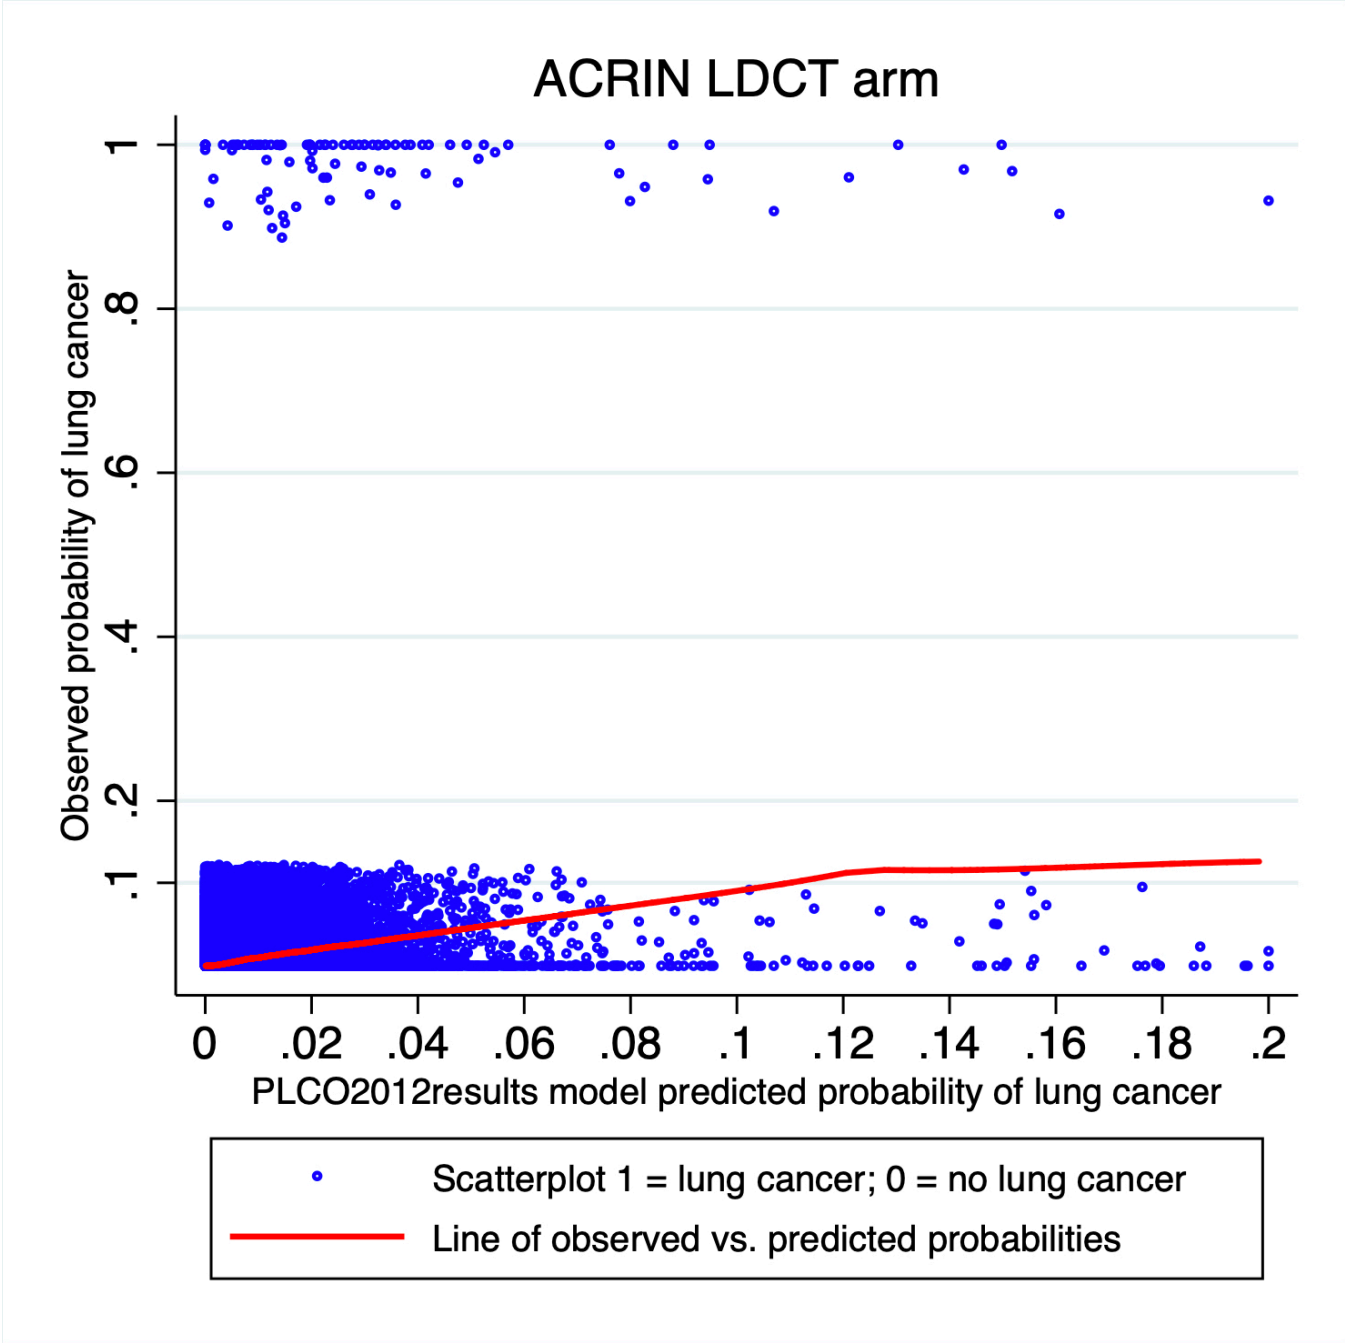

**Abbreviations:** ACRIN, American College of Radiology Imaging Network subset of the NLST; LDCT, low dose computed tomography; LSS, Lung Screening Study subset of the NLST.

\* The PLCO2012results model predicts lung cancer 1 to 4 years after the last screen and includes PLCOm2012<sub>bu</sub> scores and Lung-RADS results over 3 annual screens in four groupings as predictors. The PLCO2012results model is described in Table 1.

**eFigure 3.** Receiver operator characteristic area under the curves for predicting lung cancer in the LSS and ACRIN NLST LDCT arms 1 to 4 years post-screening for the PLCOm2012<sub>bu</sub>\* model and PLCO2012results† model, which additionally includes Lung-RADS results coded in four groups. P-values for differences in AUCs in LSS and ACRIN are <0.001.

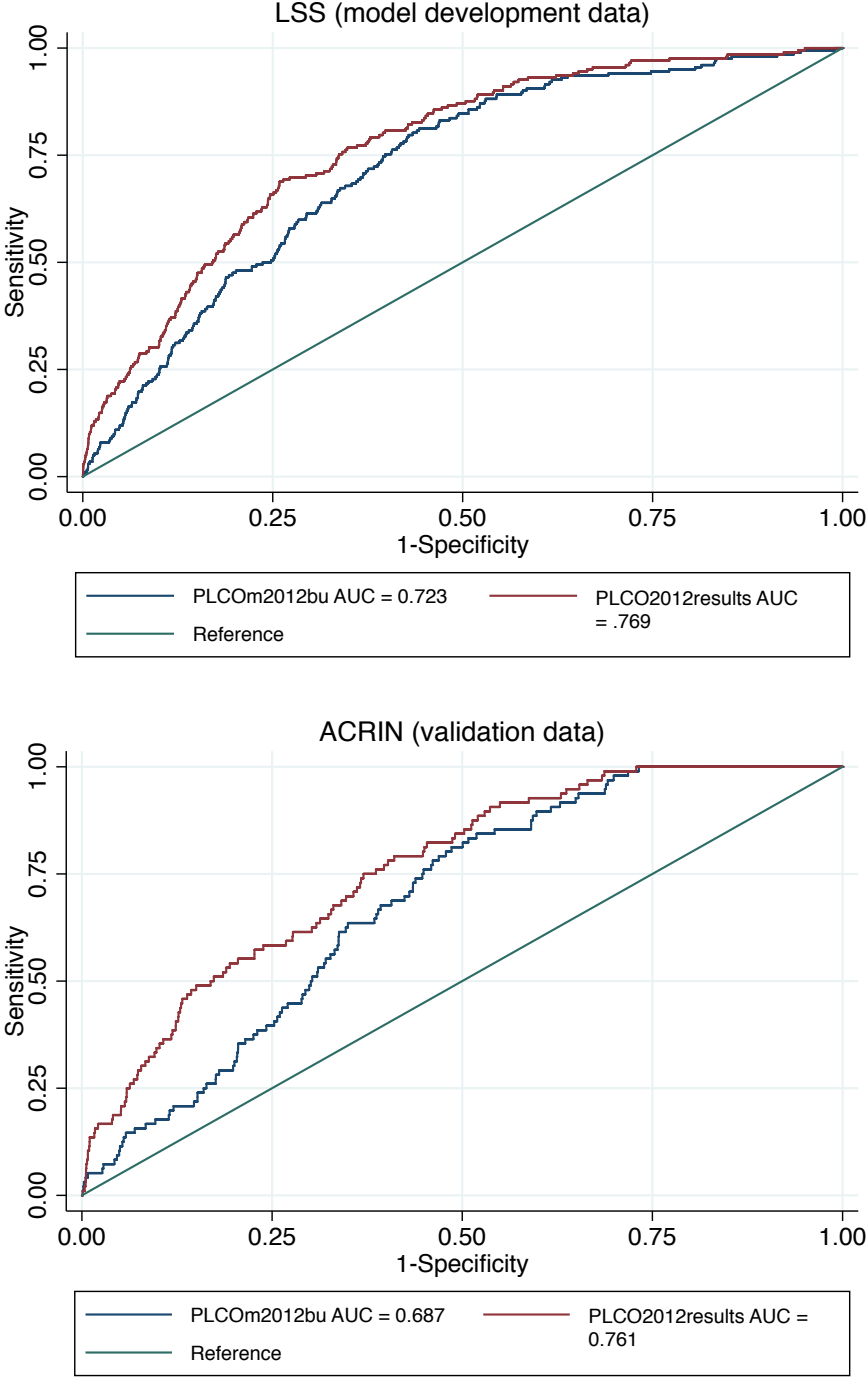

**Abbreviations:** ACRIN, American College of Radiology Imaging Network subset of the NLST; AUC, receiver operator characteristic area under the curve; LDCT, low dose computed tomography; LSS, Lung Screening Study subset of the NLST; NLST, National Lung Screening Trial; PLCOm2012 is the name of the lung cancer risk prediction model described in reference <sup>1</sup>).

\* PLCOm2012<sub>bu</sub> is the PLCOm2012 model with predictors age, smoking duration in current smokers, and quit-time in former smokers updated to the start of follow-up (T3) by adding 3 years to baseline values, and it is estimated for a three-year period, not the original six-year period, by dividing the estimate by 2.

† The PLCO2012results model predicts lung cancer 1 to 4 years after the last screen and includes PLCOm2012<sub>bu</sub> scores and Lung-RADS results over 3 rounds in four groupings as predictors. The PLCO2012results model is described in Table 1.

**eTable 1.** Characteristics of the NLST LDCT participants who were included in prediction modelling analysis

| Characteristic                              | LSS (n = 14576)         | ACRIN (n = 7653)        | P-value           | CT group (n = 22,229)*   |
|---------------------------------------------|-------------------------|-------------------------|-------------------|--------------------------|
| Age (years median)                          | 60 (IQR 57-65)          | 61 (IQR 57-65)          | $P_{NPT} = 0.005$ | 60 (IQR 57-65)           |
| Sex                                         |                         |                         |                   |                          |
| Male                                        | 8946 (61.4%)            | 4225 (55.2%)            | $P_{FET} < 0.001$ | 13171 (59.3%)            |
| Female                                      | 5630 (38.6%)            | 3428 (44.8%)            |                   | 9058 (40.7%)             |
| Race                                        |                         |                         |                   |                          |
| White, not Hispanic                         | 13123 (90.0%)           | 7087 (92.6%)            | $P_{CHI} < 0.001$ | 20210 (90.9%)            |
| Black, not Hispanic                         | 484 (3.3%)              | 382 (5.0%)              |                   | 866 (3.9%)               |
| Hispanic                                    | 207 (1.4%)              | 76 (1.0%)               |                   | 283 (1.3%)               |
| Asian                                       | 420 (2.9%)              | 48 (0.6)                |                   | 468 (2.1%)               |
| Native Hawaiian/Pacific Islander            | 60 (0.4%)               | 2 (0.0%)                |                   | 62 (0.3%)                |
| American Indian/Alaskan Native              | 40 (0.3%)               | 20 (0.3%)               |                   | 60 (0.3%)                |
| More than one race                          | 242 (1.7%)              | 38 (0.5%)               |                   | 280 (1.3%)               |
| Education                                   |                         |                         |                   |                          |
| High school graduate or less                | 4232 (29.0%)            | 2210 (28.9%)            | $P_{FET} = 0.81$  | 6442 (29.0%)             |
| Post-high school education                  | 10344 (71.0%)           | 5443 (34.5%)            |                   | 15787 (71.0%)            |
| Body mass index (kg/m <sup>2</sup> )        | 28.0 (SD 4.9)           | 28.0 (SD 5.0)           | $P_{TT} = 0.19$   | 28.0 (SD 5.0)            |
| Personal history of cancer                  |                         |                         |                   |                          |
| No                                          | 14008 (96.1%)           | 7349 (96.0%)            | $P_{FET} = 0.80$  | 21357 (96.1%)            |
| Yes                                         | 568 (3.9%)              | 304 (4.0%)              |                   | 872 (3.9%)               |
| History of COPD                             |                         |                         |                   |                          |
| No                                          | 12309 (84.5%)           | 6159 (80.5%)            | $P_{FET} < 0.001$ | 18468 (83.1%)            |
| Yes                                         | 2267 (15.5%)            | 1494 (19.5%)            |                   | 3761 (16.9%)             |
| Family history of lung cancer               |                         |                         |                   |                          |
| No                                          | 11511 (79.0%)           | 5834 (76.2%)            | $P_{FET} < 0.001$ | 17345 (78.0%)            |
| Yes                                         | 3065 (21.0%)            | 1819 (23.8%)            |                   | 4884 (22.0%)             |
| Smoking status                              |                         |                         |                   |                          |
| Former smoker                               | 7949 (54.5%)            | 3891 (50.8%)            | $P_{FET} < 0.001$ | 11840 (53.3%)            |
| Current smoker                              | 6627 (45.5%)            | 3762 (49.2%)            |                   | 10389 (46.7%)            |
| Smoking intensity (cigarettes/day)          | 28.6 (SD 11.6)          | 28.1 (SD 11.0)          | $P_{TT} = 0.001$  | 28.4 (SD 11.4)           |
| Smoking duration (years)                    | 40.5 (SD 7.0)           | 41.1 (SD 7.1)           | $P_{TT} < 0.001$  | 40.7 (SD 7.0)            |
| Smoking quit-time in former smokers (years) | 10 (n = 7949, IQR 6-14) | 10 (n = 3891, IQR 6-14) | $P_{NPT} = 0.18$  | 10 (n = 11840, IQR 6-14) |

**Abbreviations:** ACRIN, American College of Radiology Imaging Network subset of the NLST; IQR, interquartile range; LDCT, low dose computed tomography; LSS, Lung Screening Study subset of the NLST; n, subset number; NLST, National Lung Screening Trial;  $P_{CHI}$ , p-value based on the likelihood ratio chi-square test;  $P_{FET}$ , p-value based on Fisher's exact test;  $P_{NPT}$ , p-value based on nonparametric test of trend;  $P_{TT}$ , p-value based on the t-test not assuming equal standard deviations; SD, standard deviation.

\* This cohort excludes those with missing data: for education for 448 (2.0%), for body mass index for 68 (0.3%), for family history of lung cancer for 294 (1.3%), for race/ethnicity for 85 (0.4%) and for smoking quit-time for 133 (0.6%).

**eTable 2.** Comparison of the distributions of dichotomized Lung-RADS results\* over three rounds of NLST LDCT screening in four groups and lung cancers occurring 1 to 4 years following the third and final screen

| <b>4 Groups of Lung-RADS results in 3 rounds of LDCT screening</b> | <b>Lung cancers/n in results strata (% lung cancers in cell) {column %} LSS (n = 15152)</b> | <b>Lung cancers/n in results strata (% lung cancers in cell) {column %} ACRIN (n = 8075)</b> | <b>Lung cancers/n in results strata (% lung cancers in cell) {column %} LSS &amp; ACRIN combined (N = 23227)</b> |
|--------------------------------------------------------------------|---------------------------------------------------------------------------------------------|----------------------------------------------------------------------------------------------|------------------------------------------------------------------------------------------------------------------|
| Group 1<br>- - -                                                   | 116/12223 (0.9%)<br>{80.7%}                                                                 | 58/6547 (0.9%)<br>{81.1%}                                                                    | 174/18770 (0.9%)<br>{80.8%}                                                                                      |
| Group 2<br>+ - - or - + -                                          | 43/2028 (2.1%)<br>{13.4%}                                                                   | 19/1020 (1.9%)<br>{12.6%}                                                                    | 62/3048 (2.0%)<br>{13.1%}                                                                                        |
| Group 3<br>+ + - or - - +                                          | 18/621 (2.9%)<br>{4.1%}                                                                     | 17/353 (4.8%)<br>{4.4%}                                                                      | 35/974 (3.6%)<br>{4.2%}                                                                                          |
| Group 4<br>+ - + or - + + or + + +                                 | 31/280 (11.1%)<br>{1.9%}                                                                    | 13/155 (8.4%)<br>{1.9%}                                                                      | 44/435 (10.1%)<br>{1.9%}                                                                                         |

*Abbreviations:* ACRIN, American College of Radiology Imaging Network subset of the NLST; AUC, LDCT, low dose computed tomography; LSS, Lung Screening Study subset of the NLST; N, number overall; n, subset number; NLST, National Lung Screening Trial.

\* Lung-RADS scores of 1 and 2 are negative, and scores of 3 and 4 are positive.



**eTable 3.** Sensitivity, specificity, positive predictive value for the PLCOm2012<sub>bu</sub>\* and PLCO2012results† models with 3-year risk thresholds of 0.75%, 1.0% and 1.5% in LSS and ACRIN components of the NLST

| Sample and Model           | Risk Threshold = 0.75% |             |      | Risk Threshold = 1.0% |             |      | Risk Threshold = 1.5% |             |      |
|----------------------------|------------------------|-------------|------|-----------------------|-------------|------|-----------------------|-------------|------|
|                            | Sensitivity            | Specificity | PPV  | Sensitivity           | Specificity | PPV  | Sensitivity           | Specificity | PPV  |
| LSS (n = 14,576, LCA=202)  |                        |             |      |                       |             |      |                       |             |      |
| PLCOm2012 <sub>bu</sub>    | 95.1%                  | 19.6%       | 1.6% | 93.6%                 | 31.6%       | 1.9% | 83.2%                 | 52.5%       | 2.4% |
| PLCO2012results            | 93.1%                  | 41.2%       | 2.2% | 85.6%                 | 53.2%       | 2.5% | 70.3%                 | 70.6%       | 3.3% |
| ACRIN (n = 7653, LCA = 96) |                        |             |      |                       |             |      |                       |             |      |
| PLCOm2012 <sub>bu</sub>    | 100.0%                 | 16.0%       | 1.5% | 99.0%                 | 27.1%       | 1.7% | 84.4%                 | 47.2%       | 2.0% |
| PLCO2012results            | 93.7%                  | 36.4%       | 1.8% | 85.4%                 | 48.9%       | 2.1% | 65.6%                 | 67.3%       | 2.5% |

**Abbreviations:** ACRIN, American College of Radiology Imaging Network subset of the NLST; LSS, Lung Screening Study subset of the NLST; NLST, National Lung Screening Trial; PPV, positive predictive value.

\* PLCOm2012<sub>bu</sub> is the PLCOm2012 model with predictors age, smoking duration in current smokers, and quit-time in former smokers updated to the start of follow-up (T3) by adding 3 years to baseline values, and it is estimated for a three-year period, not the original six-year period.

† The PLCO2012results model predicts lung cancer 1 to 4 years after the third screen and includes PLCOm2012<sub>bu</sub> scores and Lung-RADS results over 3 rounds in four groupings as predictors. The PLCO2012results model is described in Table 1.

**eAppendix.** Decision curve analysis (DCA) comparing the net benefit of PLCOm2012<sub>bu</sub> plus screening results (PLCO2012results) versus PLCOm2012<sub>bu</sub>

In DCA, to assess the balance between benefits and harms, the number of true positive classifications minus false positive classifications is taken as a proportion of the number of classifications. This ratio is considered at different decision thresholds across a range of risks of interest, and at each threshold, the number of false positives is weighted by the odds of the risk being considered. For example, at a 2% threshold for deciding to screen an individual, the weighting is  $0.02/0.98 = 1/49$ : implying that missing one lung cancer is valued equal to the harm done by 49 false positives.

Decision curve analysis demonstrates that between risk thresholds zero to 6%, the net benefit for model PLCO2012results exceeds that of PLCOm2012<sub>bu</sub> (eFigure 4). 99.1% of the overall NLST LDCT sample had PLCO2012results 3-year risks  $\leq 6\%$ .

**eFigure 4.** Decision curve analysis comparing PLCO2012results\* which includes three years of Lung-RADS results coded into four groups versus the equivalent model excluding screening results (PLCOm2012bu<sup>†</sup>), in NLST LDCT data (N = 22,229)

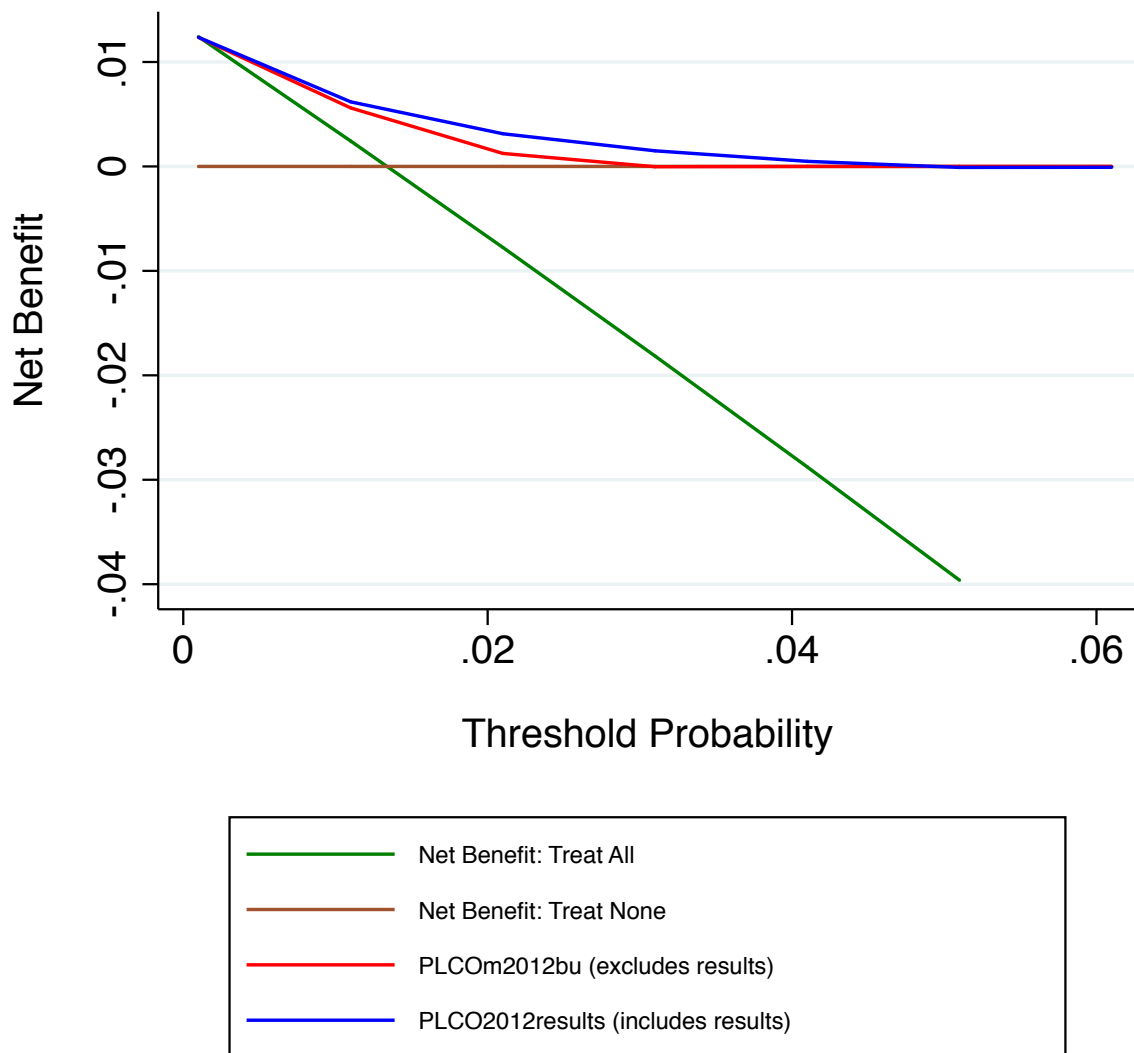

\* The PLCO2012results model predicts lung cancer 1 to 4 years after the last screen and includes PLCOm2012bu scores and Lung-RADS results over 3 annual screens in four groupings as predictors. The PLCO2012results model is described in Table 1.

† PLCOm2012bu is the PLCOm2012 model with predictors age, smoking duration in current smokers, and quit-time in former smokers updated to the start of follow-up (T3) by adding 3 years to baseline values, and it is estimated for a three-year period, not the original six-year period used for the PLCOm2012 model<sup>1</sup>.

## **eReference.**

1. Tammemägi MC, Katki HA, Hocking WG, et al. Selection criteria for lung-cancer screening. *The New England journal of medicine* 2013;368:728-36.
